# Supplementary material for: Exploring TikTok as a promising platform for geoscience communication
Source: Copernicus journal article supplement (doi:10.5194/gc-5-363-2022), 2022-11-23
Supplement: Supplementary file 1 [file gc-5-363-2022-supplement.pdf]

Supplement of Geosci. Commun., 5, 363–380, 2022  
<https://doi.org/10.5194/gc-5-363-2022-supplement>  
© Author(s) 2022. CC BY 4.0 License.

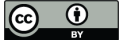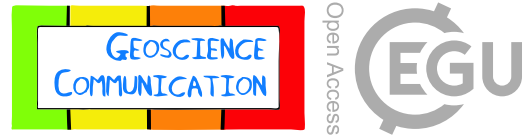

*Supplement of*

## **Exploring TikTok as a promising platform for geoscience communication**

**Emily E. Zawacki et al.**

*Correspondence to:* Emily E. Zawacki (eezawack@asu.edu)

The copyright of individual parts of the supplement might differ from the article licence.

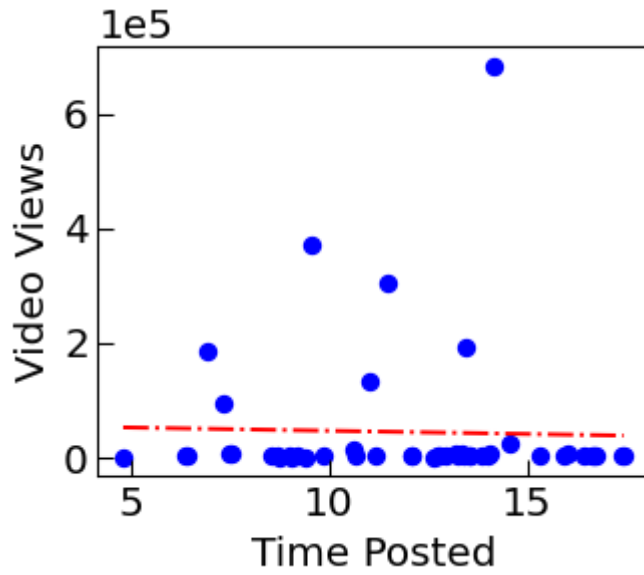

R = 0.0302  
R<sup>2</sup> = 0.000914  
P-value = 0.838

**S1.** Correlation between the number of video views received and the time a video is posted (24-hour time used, posting at Mountain Standard Time (UTC-7)). There is no observed relationship, and the correlation is not statistically significant ( $p > 0.05$ ).

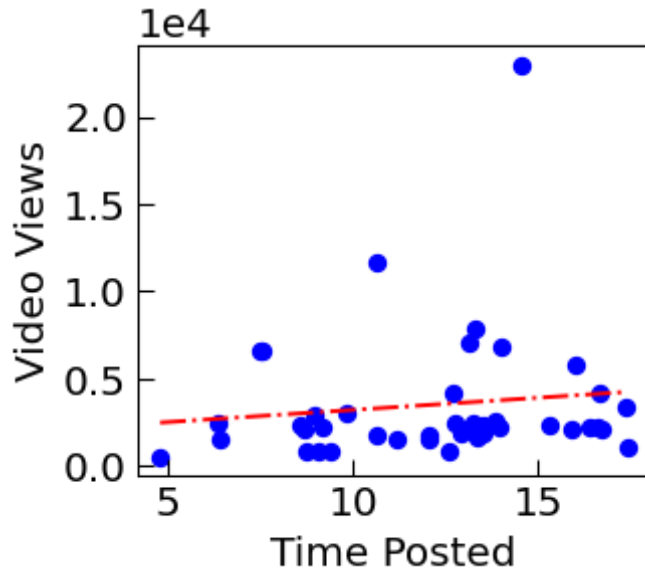

R = 0.119  
R<sup>2</sup> = 0.0142  
P-value = 0.457

**S2.** Correlation between the number of video views received and the time a video is posted (24-hour time used, posting at Mountain Standard Time (UTC-7)), excluding videos with >90,000 views. 24 hour time used. The correlation is not statistically significant ( $p > 0.05$ ).

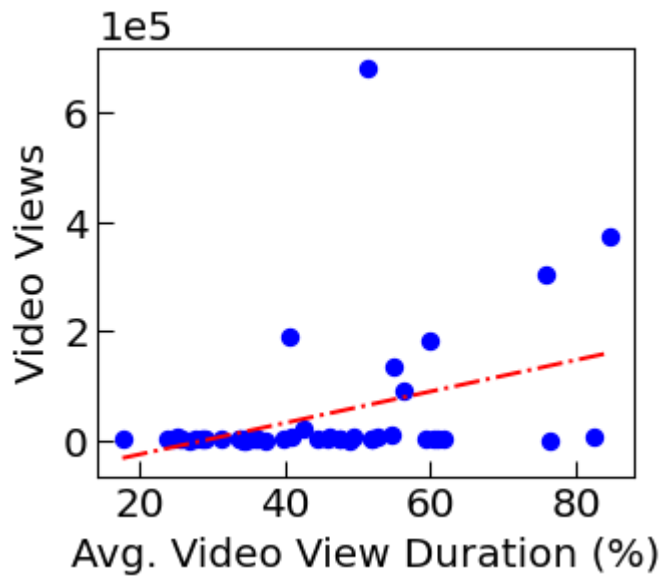

$R = 0.375$   
 $R^2 = 0.141$   
 $P\text{-value} = 0.00855$

**S3.** Correlation between the average video view duration (%) and the number of video views. There is an overall weak positive correlation that is statistically significant.

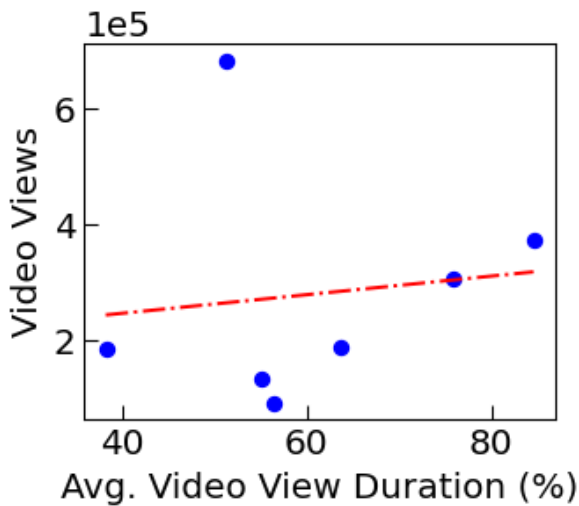

$R = 0.123$   
 $R^2 = 0.0152$   
 $P\text{-value} = 0.792$

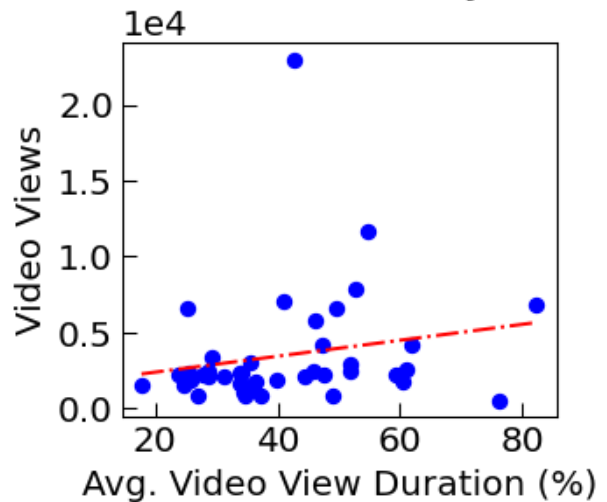

$R = 0.195$   
 $R^2 = 0.0381$   
 $P\text{-value} = 0.221$

**S4.** Correlation between the average video view duration (%) and the number of video views for videos with >90,000 views (left) and <90,000 views (right). Neither correlation is statistically significant ( $p > 0.05$ ).

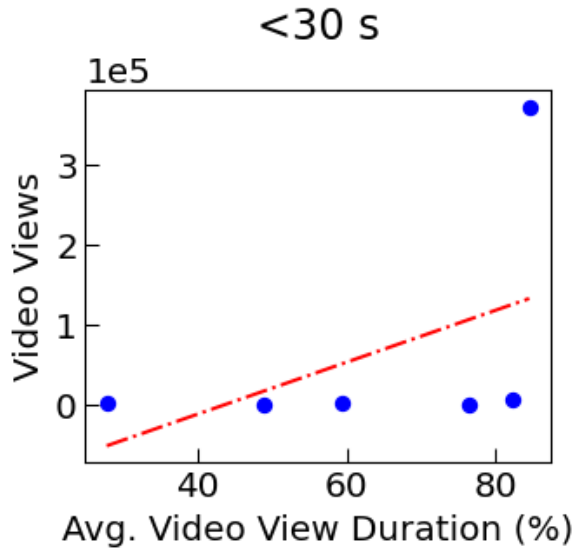

R = 0.476  
 $R^2 = 0.226$   
 P-value = 0.340

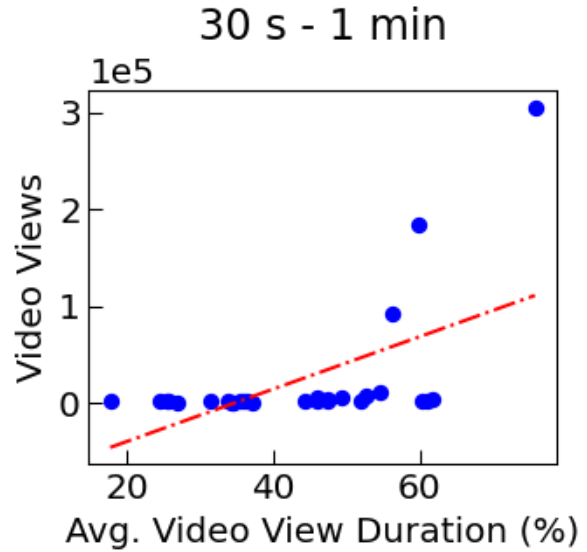

R = 0.566  
 $R^2 = 0.320$   
 P-value = 0.00169

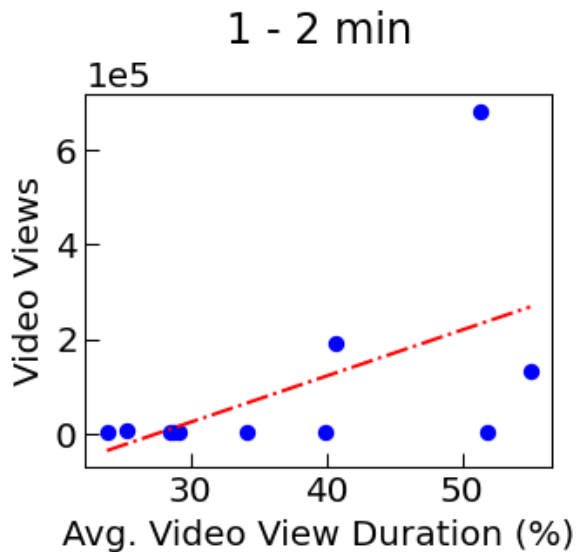

R = 0.539  
 $R^2 = 0.290$   
 P-value = 0.0873

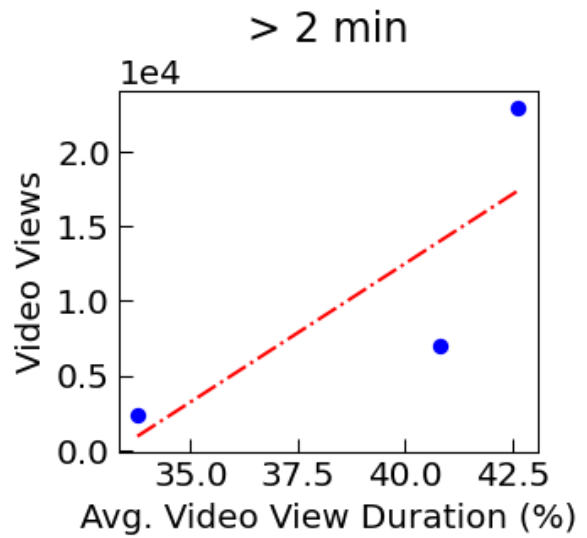

R = 0.805  
 $R^2 = 0.648$   
 P-value is =0.404

**S5.** Correlation between the number of video views and the average video view duration (%) for videos that are < 30s, 30 s – 1 min, 1 min – 2 min, and > 2 min. Only videos that are 30 s – 1 min in duration show a moderately positive statistically significant correlation.

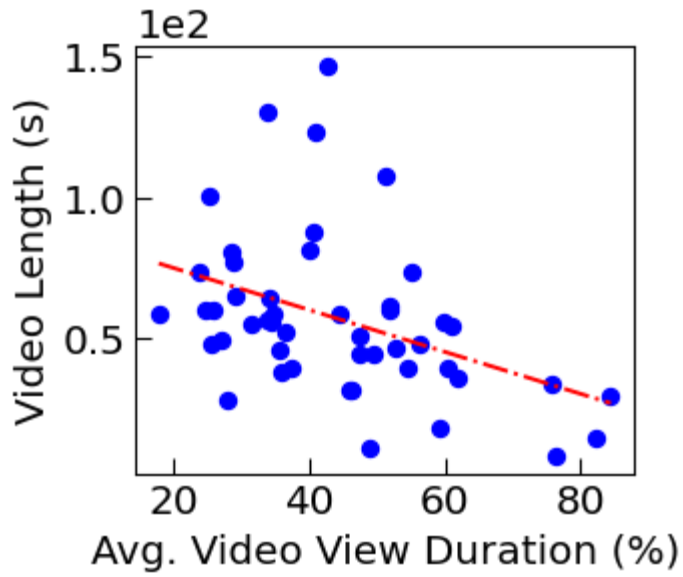

$R = -0.409$   
 $R^2 = 0.168$   
 $P\text{-value} = 0.00382$

**S6.** Correlation between the average video view duration (%) and the length of a video (s). There is a statistically significant negative correlation.

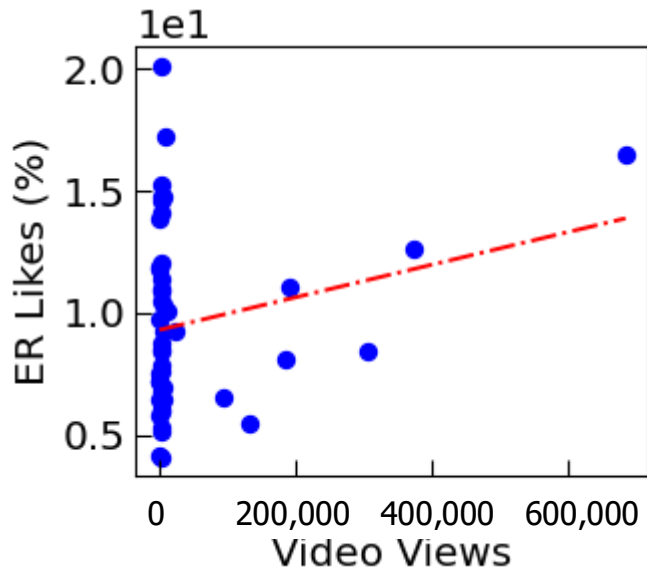

R = 0.220  
R<sup>2</sup> = 0.0485  
P-value = 0.133

**S7.** Correlation between the number of video views and the engagement rate of likes for a video. The correlation is not statistically significant ( $p > 0.05$ ).

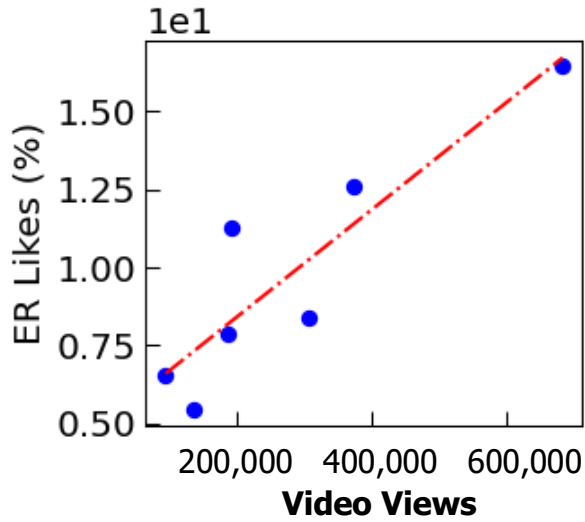

$R = 0.898$   
 $R^2 = 0.806$   
 $P\text{-value} = 0.00607$

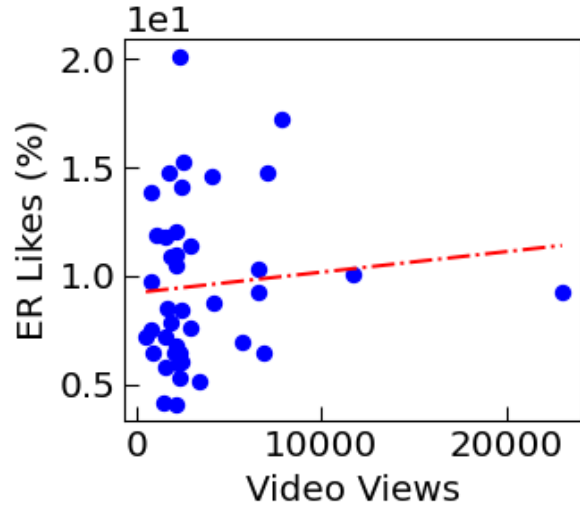

$R = 0.0986$   
 $R^2 = 0.00973$   
 $P\text{-value} = 0.539$

**S8.** Correlation between the number of video views and the engagement rate of likes for a video with >90,000 views (left) and <90,000 views (right). There is a strong positive correlation that is statistically significant between video views and the engagement rate of likes for videos with >90,000 views. There is no statistically significant correlation for videos with <90,000 views.



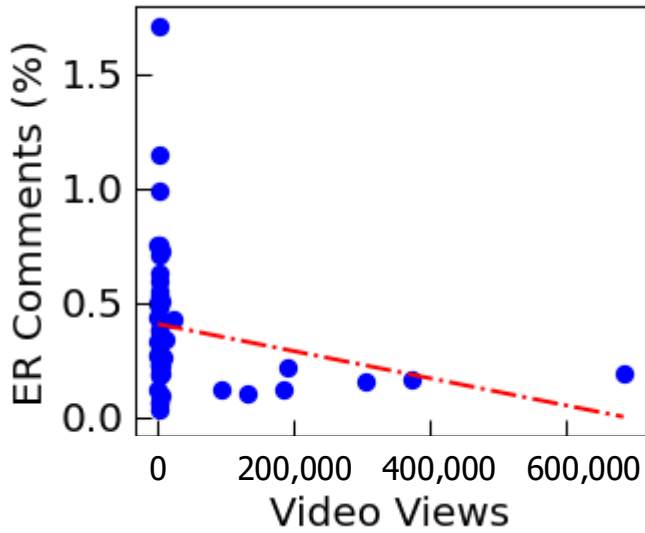

$R = 0.231$   
 $R^2 = 0.0534$   
 $P\text{-value} = 0.114$

**S9.** Correlation between the number of video views and the engagement rate of comments. The correlation is not statistically significant ( $p > 0.05$ ).

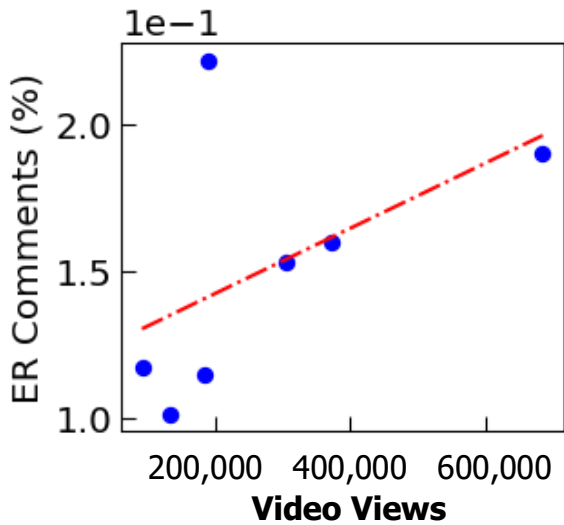

$R = 0.514$   
 $R^2 = 0.264$   
 $P\text{-value} = 0.238$

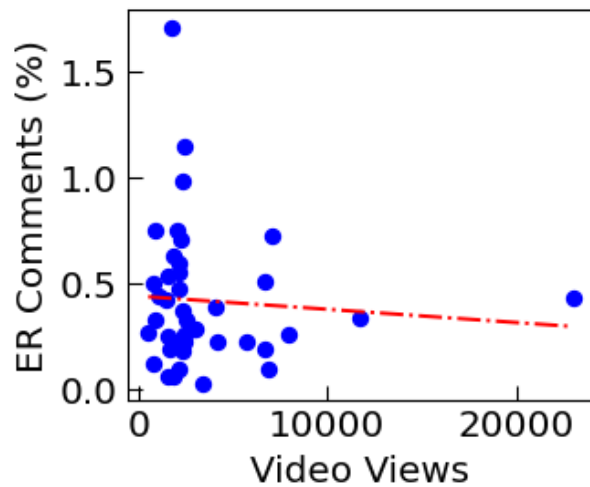

$R = 0.0751$   
 $R^2 = 0.00564$   
 $P\text{-value} = 0.641$

**S10.** Correlation between the number of video views and the engagement rate of comments for videos with  $>90,000$  views (left) and videos with  $<90,000$  views. The correlation is not statistically significant ( $p > 0.05$ ).

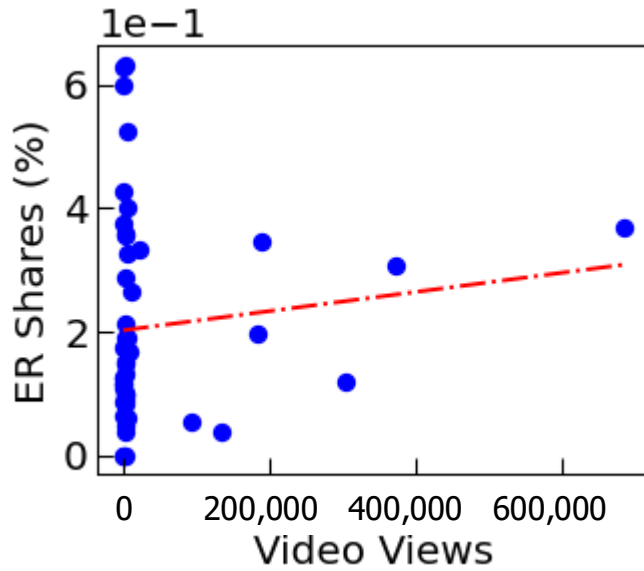

R = 0.115  
 $R^2 = 0.0132$   
 P-value = 0.434

**S11.** Correlation between the number of video views and the engagement rate of shares. The correlation is not statistically significant ( $p > 0.05$ ).

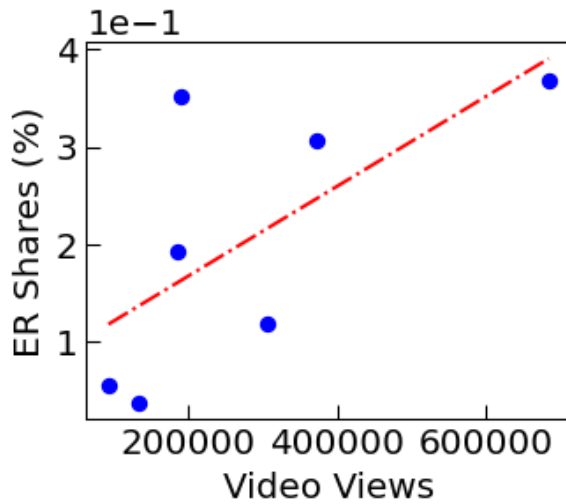

R = 0.670  
 $R^2 = 0.449$   
 P-value = 0.0994

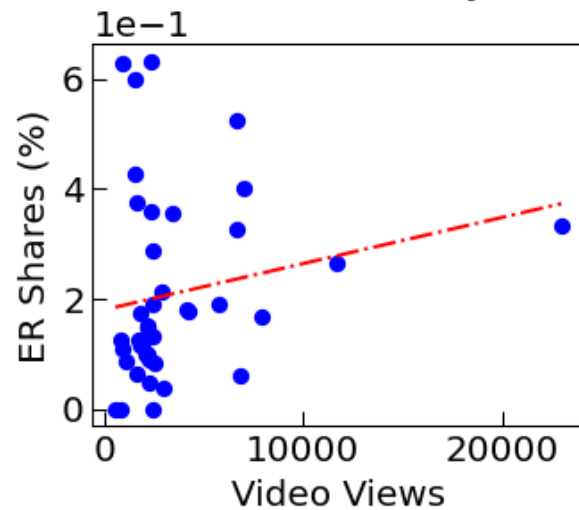

R = 0.191  
 $R^2 = 0.0364$   
 P-value = 0.232

**S12.** Correlation between the number of video views and the engagement rate of shares for videos with  $>90,000$  views (left) and  $<90,000$  views (right). The correlation is not statistically significant ( $p > 0.05$ ).

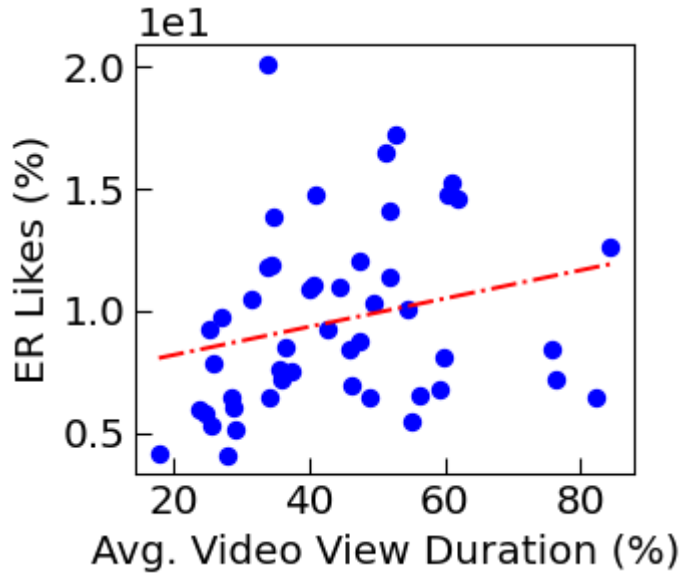

R = 0.247  
R<sup>2</sup> = 0.0611  
P-value = 0.0902

**S13.** Correlation between the average video view duration (%) and the engagement rate of likes. The correlation is not statistically significant ( $p > 0.05$ ).

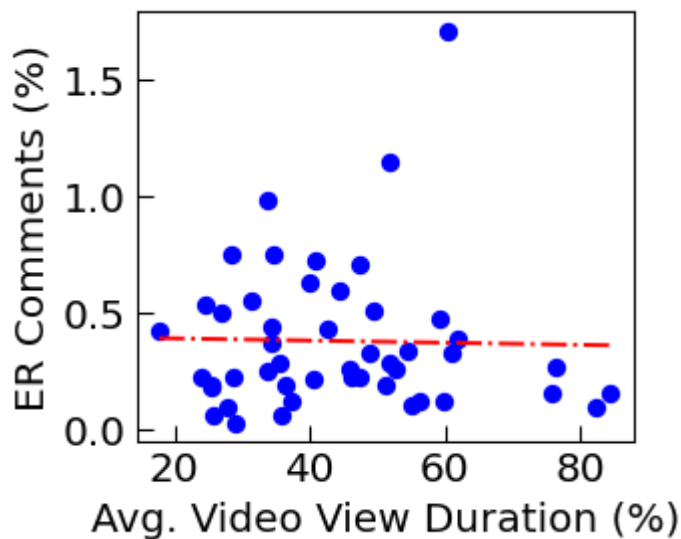

R = 0.0233  
R<sup>2</sup> = 0.000545  
P-value = 0.875

**S14.** Correlation between the average video view duration (%) and the engagement rate of comments. The correlation is not statistically significant ( $p > 0.05$ ).

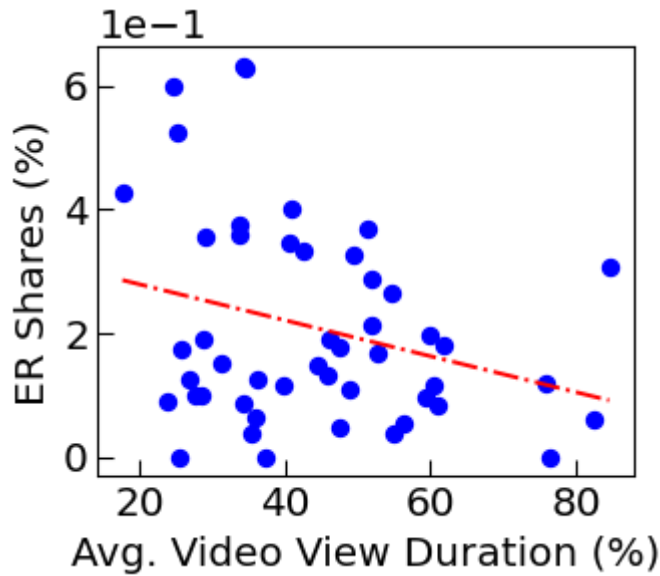

$R = 0.280$   
 $R^2 = 0.0785$   
 $P\text{-value} = 0.0538$

**S15.** Correlation between the average video view duration (%) and the engagement rate of shares. The correlation is not statistically significant ( $p > 0.05$ ).

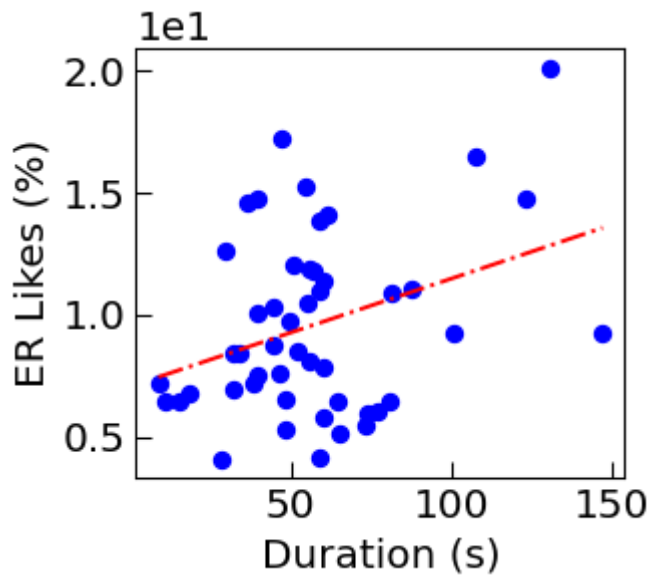

$R = 0.344$   
 $R^2 = 0.118$   
 $P\text{-value} = 0.0170$

**S16.** Correlation between the engagement rate of likes (%) and the duration of a video (s). There is a weak positive correlation that is statistically significant ( $p < 0.05$ ).

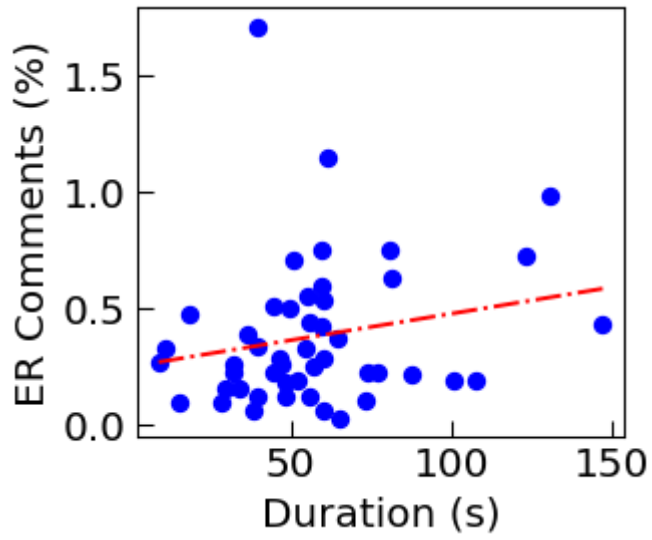

R = 0.209  
R<sup>2</sup> = 0.0437  
P-value = 0.154

**S17.** Correlation between the engagement rate of comments (%) and the duration of a video (s). The correlation is not statistically significant ( $p > 0.05$ ).

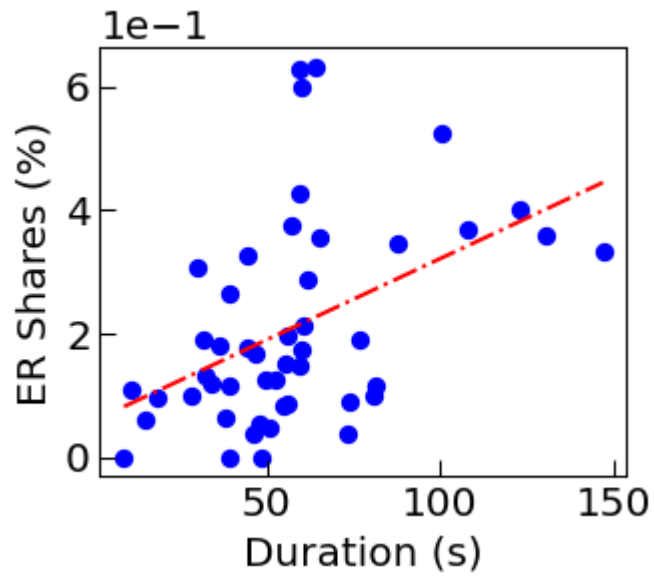

$R = 0.457$   
 $R^2 = 0.209$   
P-value = 0.00108

**S18.** Correlation between the engagement rate of shares (%) and the duration of a video (s). There is a weak to moderate positive relationship that is statistically significant ( $p < 0.05$ ).

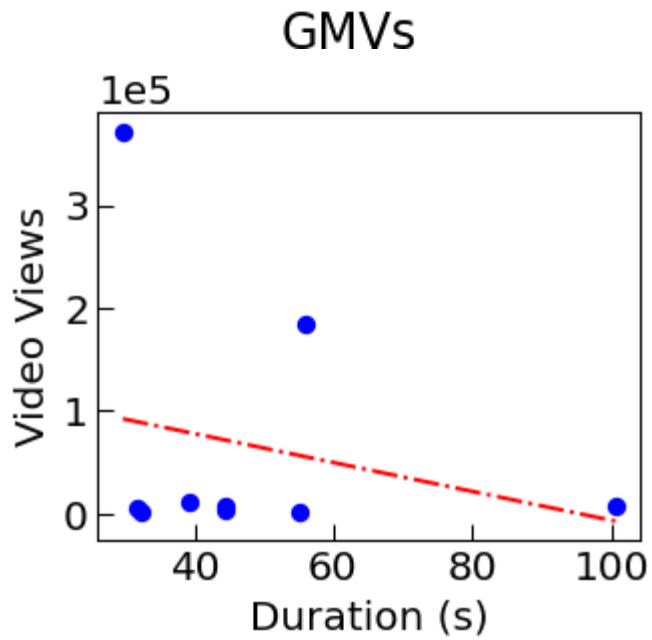

R = -0.238  
R<sup>2</sup> = 0.0567  
P-value = 0.537

**S19.** GMV videos: Correlation between the video length/duration and the number of video views for the GMV videos. There is no statistically significant correlation.

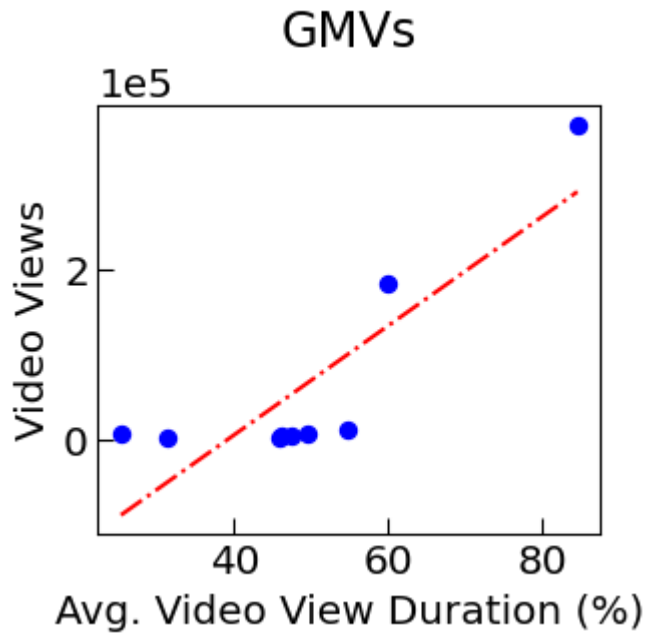

R = 0.847  
R<sup>2</sup> = 0.717  
P-value = 0.00398

**S20.** Correlation between the video view duration and the number of video views for the GMV videos. There is a strong positive correlation that is statistically significant.



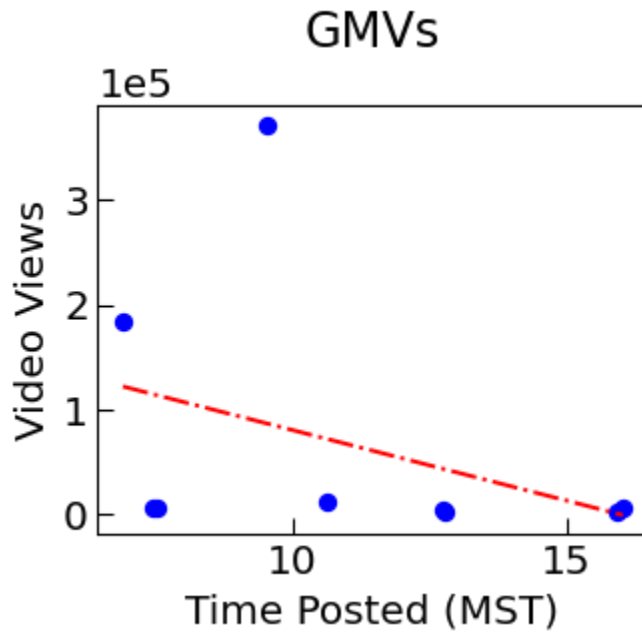

R = -0.36708096023244136  
R<sup>2</sup> = 0.134748431365171  
P-value = 0.312

**S21.** Correlation between the time a video was posted (24 hour time, Mountain Standard Time MST) and the number of video views for the GMV videos. There is a weak negative correlation that is not statistically significant.

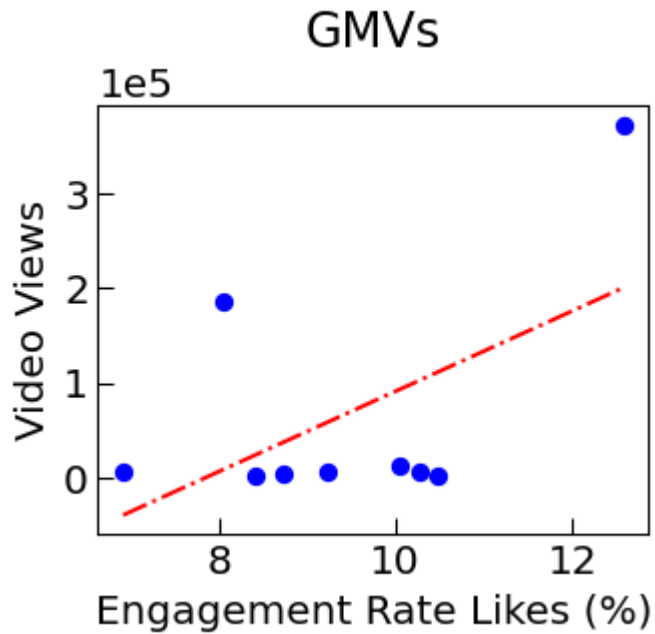

R = .5411468509829077  
R<sup>2</sup> = 0.2928399143287176  
P-value = 0.132

**S22.** Correlation between the engagement rate of likes and the number of video views for the GMV videos. There is a moderately positive relationship that is not statistically significant.

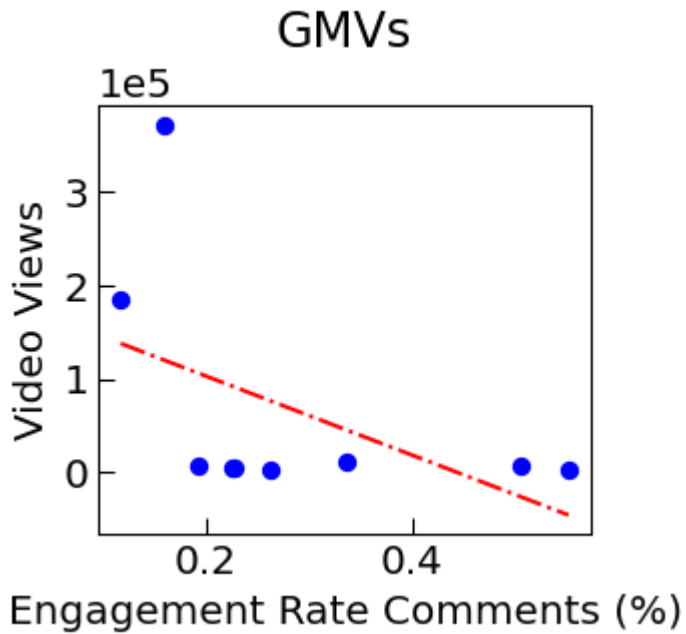

R = -0.495  
R<sup>2</sup> = 0.245  
P-value = 0.176

**S23.** Correlation between the engagement rate of comments and the number of video views for the GMV videos. There is a weak negative relationship that is not statistically significant.

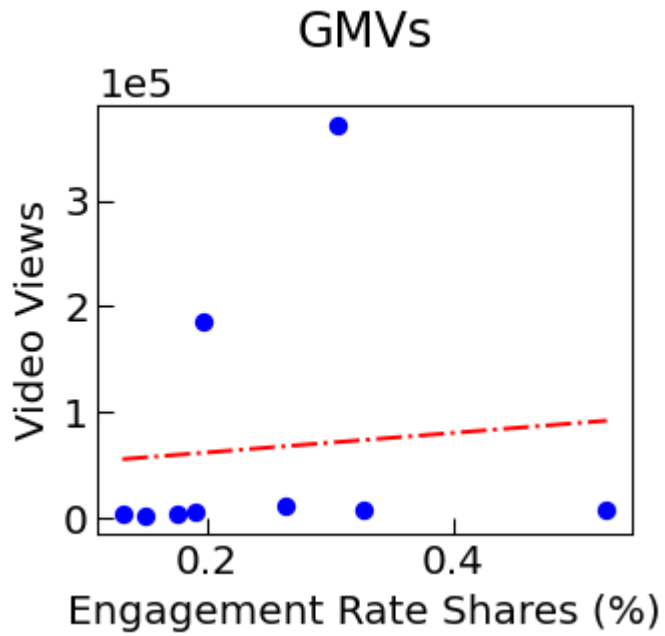

R = 0.0880  
R<sup>2</sup> = 0.00775  
P-value = 0.822

**S24.** Correlation between the engagement rate of shares and the number of video views for the GMV videos. There is a no statistically significant correlation.
